# Supplementary material for: Changes in the gut microbiome and fermentation products concurrent with enhanced longevity in acarbose-treated mice
Source: PubMed Central journal article supplement (PMC6567620; doi:10.1186/s12866-019-1494-7), 2019-06-13

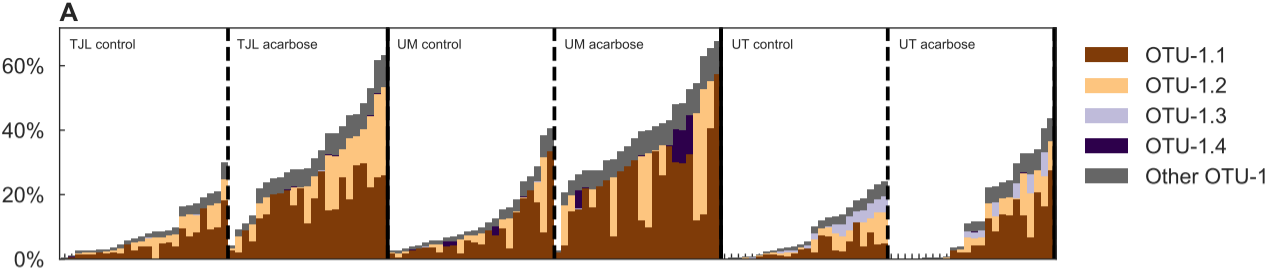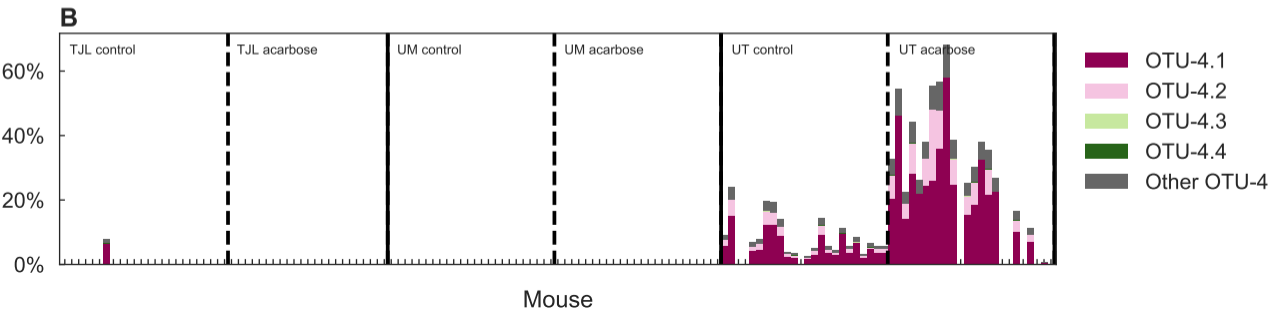

Supplement: 12866_2019_1494_MOESM3_ESM.pdf [file 12866_2019_1494_MOESM3_ESM.pdf]
